# Supplementary material
Source: MDPI journal article supplement (https://www.mdpi.com/2075-163X/13/2/156)
Supplement: s1 [file s1]

Archive with 2 entries (2 files):
- 2022_Acevedo and Kamber_Supplementary Material S1_re-submitted.pdf
- 2022_Acevedo and Kamber_Supplementary Material S2_re-submitted.pdf
